# Supplementary material for: Acquisition of virulence genes by a carrier strain gave rise to the ongoing epidemics of meningococcal disease in West Africa
Source: PubMed Central journal article supplement — Proc Natl Acad Sci U S A. 2018 May 7;115(21):5510–5. doi: 10.1073/pnas.1802298115 (PMC6003489; doi:10.1073/pnas.1802298115), 2018-05-07
Supplement: pnas.1802298115.sapp.pdf [file pnas.1802298115.sapp.pdf]

| Isolate name | Year | Country      | District     | Host status | Serogroup | PorA type | ST    | No. of contigs | Median coverage | ENA accession no. | BIGS id. |
|--------------|------|--------------|--------------|-------------|-----------|-----------|-------|----------------|-----------------|-------------------|----------|
| BL16188      | 2012 | Burkina Faso | Bogodogo     | carrier     | NG        | 21-15,16  | 9367  | 1              | 156.8           | ERS2071237        | 56603    |
| Niga8_13     | 2013 | Nigeria      | Tambuwal     | diseased    | C         | 21-15,16  | 10217 | 1              | 175.4           | ERS2071247        | 56602    |
| Niga9_13     | 2013 | Nigeria      | Tambuwal     | diseased    | C         | 21-15,16  | 10217 | 106            | 146.5           | ERS2071248        | 54787    |
| Niga13_13    | 2013 | Nigeria      | Tambuwal     | diseased    | C         | 21-15,16  | 10217 | 110            | 131.7           | ERS2071242        | 54788    |
| Niga17_13    | 2013 | Nigeria      | Tambuwal     | diseased    | C         | 21-15,16  | 10217 | 105            | 133.0           | ERS2071243        | 54789    |
| Niga19_13    | 2013 | Nigeria      | Tambuwal     | diseased    | C         | 21-15,16  | 10217 | 104            | 104.9           | ERS2071244        | 54790    |
| Niga20_13    | 2013 | Nigeria      | Tambuwal     | diseased    | C         | 21-15,16  | 10217 | 104            | 123.3           | ERS2071245        | 54791    |
| Niga21_13    | 2013 | Nigeria      | Tambuwal     | diseased    | C         | 21-15,16  | 10217 | 112            | 148.7           | ERS2071246        | 54792    |
| Niga1_14     | 2014 | Nigeria      | Aliero       | diseased    | C         | 21-15,16  | 10217 | 107            | 128.1           | ERS2071249        | 54713    |
| Niga2_14     | 2014 | Nigeria      | Aliero       | diseased    | C         | 21-15,16  | 10217 | 108            | 112.3           | ERS2071259        | 54739    |
| Niga3_14     | 2014 | Nigeria      | Aliero       | diseased    | C         | 21-15,16  | 10217 | 106            | 131.1           | ERS2071273        | 54740    |
| Niga10_14    | 2014 | Nigeria      | Shagari      | diseased    | C         | 21-15,16  | 10217 | 93             | 97.1            | ERS2071251        | 54802    |
| Niga17_14    | 2014 | Nigeria      | Bodinga      | diseased    | C         | 21-15,16  | 10217 | 93             | 65.3            | ERS2071257        | 54804    |
| 19_15        | 2015 | Niger        | Dosso        | diseased    | C         | 21-15,16  | 10217 | 191            | 126.9           | ERS2071190        | 38281    |
| 126_15       | 2015 | Niger        | Dosso        | diseased    | C         | 21-15,16  | 10217 | 264            | 80.0            | ERS2071175        | 38285    |
| 587_15       | 2015 | Niger        | Niamey       | diseased    | C         | 21-15,16  | 10217 | 220            | 90.2            | ERS2071232        | 38289    |
| 606_15       | 2015 | Niger        | Niamey       | diseased    | C         | 21-15,16  | 10217 | 247            | 70.6            | ERS2071233        | 38290    |
| 645_15       | 2015 | Niger        | Dosso        | diseased    | C         | 21-15,16  | 10217 | 222            | 96.1            | ERS2071234        | 38291    |
| 685_15       | 2015 | Niger        | Tahoua       | diseased    | C         | 21-15,16  | 10217 | 207            | 79.6            | ERS2071235        | 38293    |
| 982_15       | 2015 | Niger        | Unknown      | diseased    | C         | 21-15,16  | 10217 | 222            | 75.6            | ERS2071236        | 38294    |
| 1024_15      | 2015 | Niger        | Tillabery    | diseased    | C         | 21-15,16  | 10217 | 322            | 56.5            | ERS2071163        | 38296    |
| 1025_15      | 2015 | Niger        | Tillabery    | diseased    | C         | 21-15,16  | 10217 | 208            | 118.9           | ERS2071164        | 38297    |
| 1063_15      | 2015 | Niger        | Tillabery    | diseased    | C         | 21-15,16  | 10217 | 221            | 134.5           | ERS2071165        | 38298    |
| 1077_15      | 2015 | Niger        | Dosso        | diseased    | C         | 21-15,16  | 10217 | 234            | 129.1           | ERS2071166        | 38300    |
| 1078_15      | 2015 | Niger        | Dosso        | diseased    | C         | 21-15,16  | 10217 | 242            | 129.2           | ERS2071167        | 38301    |
| 1098_15      | 2015 | Niger        | Dosso        | diseased    | C         | 21-15,16  | 10217 | 159            | 19.1            | ERS2071168        | 38420    |
| 1099_15      | 2015 | Niger        | Dosso        | diseased    | C         | 21-15,16  | 10217 | 172            | 15.0            | ERS2071169        | 38421    |
| 1103_15      | 2015 | Niger        | Dosso        | diseased    | C         | 21-15,16  | 10217 | 112            | 26.2            | ERS2071170        | 38422    |
| 1168_15      | 2015 | Niger        | Tillabery    | diseased    | C         | 21-15,16  | 10217 | 131            | 21.0            | ERS2071171        | 38423    |
| 1169_15      | 2015 | Niger        | Tillabery    | diseased    | C         | 21-15,16  | 10217 | 115            | 23.3            | ERS2071172        | 38424    |
| Niga2_15     | 2015 | Nigeria      | Aliero       | diseased    | C         | 21-15,16  | 10217 | 136            | 17.8            | ERS2071260        | 38462    |
| Niga5_15     | 2015 | Nigeria      | Aliero       | diseased    | C         | 21-15,16  | 10217 | 198            | 14.3            | ERS2071281        | 38475    |
| Niga12_15    | 2015 | Nigeria      | Shagari      | diseased    | C         | 21-15,16  | 10217 | 141            | 23.7            | ERS2071253        | 38479    |
| Niga13_15    | 2015 | Nigeria      | Shagari      | diseased    | C         | 21-15,16  | 10217 | 120            | 21.7            | ERS2071254        | 38481    |
| Niga16_15    | 2015 | Nigeria      | Shagari      | diseased    | C         | 21-15,16  | 10217 | 185            | 40.7            | ERS2071256        | 38482    |
| Niga17_15    | 2015 | Nigeria      | Danko-Wasagu | diseased    | C         | 21-15,16  | 10217 | 106            | 43.5            | ERS2071258        | 38483    |
| Niga21_15    | 2015 | Nigeria      | Shagari      | diseased    | C         | 21-15,16  | 10217 | 139            | 27.4            | ERS2071263        | 38484    |
| Niga25_15    | 2015 | Nigeria      | Shagari      | diseased    | C         | 21-15,16  | 10217 | 105            | 31.8            | ERS2071265        | 38485    |
| Niga26_15    | 2015 | Nigeria      | Shagari      | diseased    | C         | 21-15,16  | 10217 | 132            | 25.2            | ERS2071267        | 38486    |
| Niga29_15    | 2015 | Nigeria      | Jega         | diseased    | C         | 21-15,16  | 10217 | 107            | 33.7            | ERS2071271        | 38487    |
| 1172_15      | 2015 | Niger        | Tillabery    | diseased    | C         | 21-15,16  | 10217 | 105            | 145.3           | ERS2071173        | 38496    |
| 1174_15      | 2015 | Niger        | Tillabery    | diseased    | C         | 21-15,16  | 10217 | 103            | 271.8           | ERS2071174        | 38497    |
| 1376_15      | 2015 | Niger        | Niamey       | diseased    | C         | 21-15,16  | 10217 | 101            | 212.0           | ERS2071176        | 38498    |
| 1385_15      | 2015 | Niger        | Niamey       | diseased    | C         | 21-15,16  | 10217 | 107            | 205.1           | ERS2071177        | 38499    |
| 1395_15      | 2015 | Niger        | Unknown      | diseased    | C         | 21-15,16  | 10217 | 105            | 147.7           | ERS2071178        | 38500    |
| 1396_15      | 2015 | Niger        | Niamey       | diseased    | C         | 21-15,16  | 10217 | 101            | 255.1           | ERS2071179        | 38501    |

|         |      |       |              |          |   |          |       |     |       |            |       |
|---------|------|-------|--------------|----------|---|----------|-------|-----|-------|------------|-------|
| 1434_15 | 2015 | Niger | Niamey       | diseased | C | 21-15,16 | 10217 | 127 | 187.3 | ERS2071180 | 38502 |
| 1437_15 | 2015 | Niger | Niamey       | diseased | C | 21-15,16 | 10217 | 104 | 150.3 | ERS2071181 | 38503 |
| 1640_15 | 2015 | Niger | Tillabery    | diseased | C | 21-15,16 | 10217 | 100 | 213.2 | ERS2071182 | 38504 |
| 1641_15 | 2015 | Niger | Tillabery    | diseased | C | 21-15,16 | 10217 | 99  | 220.4 | ERS2071183 | 38505 |
| 1659_15 | 2015 | Niger | Niamey       | diseased | C | 21-15,16 | 10217 | 95  | 177.7 | ERS2071184 | 38507 |
| 1660_15 | 2015 | Niger | Niamey       | diseased | C | 21-15,16 | 10217 | 110 | 115.9 | ERS2071185 | 38508 |
| 1661_15 | 2015 | Niger | Niamey       | diseased | C | 21-15,16 | 10217 | 107 | 120.8 | ERS2071186 | 38509 |
| 1662_15 | 2015 | Niger | Niamey       | diseased | C | 21-15,16 | 10217 | 104 | 58.7  | ERS2071187 | 38510 |
| 1663_15 | 2015 | Niger | Niamey       | diseased | C | 21-15,16 | 10217 | 101 | 221.7 | ERS2071188 | 38511 |
| 1898_15 | 2015 | Niger | Kollo        | diseased | C | 21-15,16 | 10217 | 106 | 108.8 | ERS2071189 | 38513 |
| 1945_15 | 2015 | Niger | Niamey       | diseased | C | 21-15,16 | 10217 | 99  | 138.1 | ERS2071191 | 38514 |
| 1946_15 | 2015 | Niger | Niamey       | diseased | C | 21-15,16 | 10217 | 97  | 221.9 | ERS2071192 | 38515 |
| 1947_15 | 2015 | Niger | Niamey       | diseased | C | 21-15,16 | 10217 | 95  | 142.1 | ERS2071193 | 38516 |
| 1956_15 | 2015 | Niger | Niamey       | diseased | C | 21-15,16 | 10217 | 101 | 136.4 | ERS2071194 | 38517 |
| 2007_15 | 2015 | Niger | Dogondoutchi | diseased | C | 21-15,16 | 10217 | 107 | 121.0 | ERS2071195 | 38518 |
| 2014_15 | 2015 | Niger | Dogondoutchi | diseased | C | 21-15,16 | 10217 | 108 | 61.6  | ERS2071196 | 38519 |
| 2015_15 | 2015 | Niger | Dogondoutchi | diseased | C | 21-15,16 | 10217 | 172 | 95.7  | ERS2071197 | 39202 |
| 2023_15 | 2015 | Niger | Dogondoutchi | diseased | C | 21-15,16 | 10217 | 165 | 100.7 | ERS2071198 | 39203 |
| 2043_15 | 2015 | Niger | Dogondoutchi | diseased | C | 21-15,16 | 10217 | 175 | 66.0  | ERS2071199 | 39205 |
| 2081_15 | 2015 | Niger | Filingue     | diseased | C | 21-15,16 | 10217 | 169 | 41.0  | ERS2071200 | 39206 |
| 2085_15 | 2015 | Niger | Filingue     | diseased | C | 21-15,16 | 10217 | 174 | 46.2  | ERS2071201 | 39207 |
| 2137_15 | 2015 | Niger | Dogondoutchi | diseased | C | 21-15,16 | 10217 | 99  | 270.5 | ERS2071202 | 39209 |
| 2380_15 | 2015 | Niger | Niamey       | diseased | C | 21-15,16 | 10217 | 102 | 119.1 | ERS2071203 | 39211 |
| 2385_15 | 2015 | Niger | Tera         | diseased | C | 21-15,16 | 10217 | 105 | 224.2 | ERS2071204 | 39212 |
| 2398_15 | 2015 | Niger | Tera         | diseased | C | 21-15,16 | 10217 | 101 | 190.6 | ERS2071205 | 39213 |
| 2399_15 | 2015 | Niger | Tera         | diseased | C | 21-15,16 | 10217 | 104 | 210.2 | ERS2071206 | 39214 |
| 2400_15 | 2015 | Niger | Tera         | diseased | C | 21-15,16 | 10217 | 102 | 140.3 | ERS2071207 | 39215 |
| 2405_15 | 2015 | Niger | Tera         | diseased | C | 21-15,16 | 10217 | 98  | 275.0 | ERS2071208 | 39216 |
| 2441_15 | 2015 | Niger | Niamey       | diseased | C | 21-15,16 | 10217 | 93  | 231.2 | ERS2071209 | 39217 |
| 2464_15 | 2015 | Niger | Niamey       | diseased | C | 21-15,16 | 10217 | 102 | 206.5 | ERS2071210 | 39218 |
| 2491_15 | 2015 | Niger | Niamey       | diseased | C | 21-15,16 | 10217 | 107 | 217.5 | ERS2071211 | 39219 |
| 2548_15 | 2015 | Niger | Niamey       | diseased | C | 21-15,16 | 10217 | 102 | 166.9 | ERS2071212 | 39220 |
| 2586_15 | 2015 | Niger | Kollo        | diseased | C | 21-15,16 | 10217 | 99  | 243.4 | ERS2071213 | 39221 |
| 3180_15 | 2015 | Niger | Niamey       | diseased | C | 21-15,16 | 10217 | 106 | 138.6 | ERS2071214 | 39223 |
| 3271_15 | 2015 | Niger | Unknown      | diseased | C | 21-15,16 | 10217 | 101 | 163.0 | ERS2071215 | 39224 |
| 3411_15 | 2015 | Niger | Niamey       | diseased | C | 21-15,16 | 10217 | 105 | 212.5 | ERS2071216 | 39225 |
| 3412_15 | 2015 | Niger | Niamey       | diseased | C | 21-15,16 | 10217 | 102 | 239.9 | ERS2071217 | 39226 |
| 3422_15 | 2015 | Niger | Niamey       | diseased | C | 21-15,16 | 10217 | 101 | 189.8 | ERS2071218 | 39227 |
| 3641_15 | 2015 | Niger | Niamey       | diseased | C | 21-15,16 | 10217 | 100 | 107.9 | ERS2071219 | 39228 |
| 3642_15 | 2015 | Niger | Niamey       | diseased | C | 21-15,16 | 10217 | 103 | 72.4  | ERS2071220 | 39229 |
| 3643_15 | 2015 | Niger | Niamey       | diseased | C | 21-15,16 | 10217 | 91  | 114.9 | ERS2071221 | 39230 |
| 3644_15 | 2015 | Niger | Niamey       | diseased | C | 21-15,16 | 10217 | 105 | 79.9  | ERS2071222 | 39231 |
| 3645_15 | 2015 | Niger | Niamey       | diseased | C | 21-15,16 | 10217 | 109 | 64.4  | ERS2071223 | 39232 |
| 3769_15 | 2015 | Niger | Tillabery    | diseased | C | 21-15,16 | 10217 | 99  | 90.5  | ERS2071224 | 39233 |
| 3772_15 | 2015 | Niger | Tillabery    | diseased | C | 21-15,16 | 10217 | 120 | 60.0  | ERS2071225 | 39234 |
| 3828_15 | 2015 | Niger | Dosso        | diseased | C | 21-15,16 | 10217 | 103 | 80.3  | ERS2071226 | 39235 |
| 3882_15 | 2015 | Niger | Niamey       | diseased | C | 21-15,16 | 10217 | 95  | 109.9 | ERS2071227 | 39237 |
| 3884_15 | 2015 | Niger | Niamey       | diseased | C | 21-15,16 | 10217 | 106 | 122.7 | ERS2071228 | 39238 |
| 3949_15 | 2015 | Niger | Niamey       | diseased | C | 21-15,16 | 10217 | 103 | 82.3  | ERS2071229 | 39239 |

|           |      |         |         |          |    |          |       |      |       |            |       |
|-----------|------|---------|---------|----------|----|----------|-------|------|-------|------------|-------|
| 3962_15   | 2015 | Niger   | Niamey  | diseased | C  | 21-15,16 | 10217 | 101  | 87.7  | ERS2071230 | 39240 |
| 4019_15   | 2015 | Niger   | Niamey  | diseased | C  | 21-15,16 | 10217 | 106  | 74.2  | ERS2071231 | 39241 |
| Niga6_15  | 2015 | Nigeria | Aliero  | diseased | C  | 21-15,16 | 10217 | 113  | 18.9  | ERS2071282 | 39507 |
| Niga8_15  | 2015 | Nigeria | Aliero  | diseased | C  | 21-15,16 | 10217 | 97   | 15.0  | ERS2071284 | 39508 |
| Niga9_15  | 2015 | Nigeria | Aliero  | diseased | C  | 21-15,16 | 10217 | 108  | 20.6  | ERS2071285 | 39509 |
| Niga3_16  | 2016 | Nigeria | Sokoto  | diseased | C  | 21-15,16 | 10217 | 108  | 89.1  | ERS2071274 | 43982 |
| Niga2_16  | 2016 | Nigeria | Sokoto  | diseased | C  | 21-15,16 | 10217 | 100  | 98.9  | ERS2071261 | 44049 |
| Niga1_16  | 2016 | Nigeria | Sokoto  | diseased | C  | 21-15,16 | 10217 | 102  | 142.2 | ERS2071250 | 44050 |
| Niga4_16  | 2016 | Nigeria | Sokoto  | diseased | C  | 21-15,16 | 10217 | 102  | 83.4  | ERS2071279 | 44051 |
| Niga24_16 | 2016 | Nigeria | Sokoto  | diseased | C  | 21-15,16 | 10217 | 125  | 95.4  | ERS2071264 | 50501 |
| Niga25_16 | 2016 | Nigeria | Sokoto  | diseased | C  | 21-15,16 | 10217 | 108  | 97.6  | ERS2071266 | 50502 |
| Niga26_16 | 2016 | Nigeria | Sokoto  | diseased | C  | 21-15,16 | 10217 | 124  | 88.7  | ERS2071268 | 50503 |
| Niga27_16 | 2016 | Nigeria | Sokoto  | diseased | C  | 21-15,16 | 10217 | 111  | 97.7  | ERS2071269 | 50504 |
| Niga28_16 | 2016 | Nigeria | Sokoto  | diseased | C  | 21-15,16 | 10217 | 131  | 74.9  | ERS2071270 | 50505 |
| Niga29_16 | 2016 | Nigeria | Sokoto  | diseased | C  | 21-15,16 | 10217 | 128  | 83.2  | ERS2071272 | 50506 |
| Niga30_16 | 2016 | Nigeria | Sokoto  | diseased | C  | 21-15,16 | 10217 | 174  | 119.9 | ERS2071275 | 50507 |
| Niga31_16 | 2016 | Nigeria | Sokoto  | diseased | C  | 21-15,16 | 10217 | 118  | 106.2 | ERS2071276 | 50508 |
| Niga32_16 | 2016 | Nigeria | Sokoto  | diseased | NG | 21-15,16 | 10217 | 98   | 121.6 | ERS2071277 | 50509 |
| Niga33_16 | 2016 | Nigeria | Sokoto  | diseased | C  | 21-15,16 | 10217 | 95   | 111.3 | ERS2071278 | 50510 |
| Niga4_17  | 2017 | Nigeria | Zamfara | diseased | C  | 21-15,16 | 10217 | 107  | 189.2 | ERS2071280 | 54464 |
| Niga6_17  | 2017 | Nigeria | Zamfara | diseased | C  | 21-15,16 | 10217 | 111  | 176.0 | ERS2071283 | 54465 |
| Niga9_17  | 2017 | Nigeria | Sokoto  | diseased | C  | 21-15,16 | 10217 | 121  | 165.5 | ERS2071286 | 54466 |
| Niga11_17 | 2017 | Nigeria | Zamfara | diseased | C  | 21-15,16 | 10217 | 100  | 170.5 | ERS2071252 | 54467 |
| Niga20_17 | 2017 | Nigeria | Katsina | diseased | C  | 21-15,16 | 10217 | 97   | 171.7 | ERS2071262 | 54468 |
| Niga14_17 | 2017 | Nigeria | Zamfara | diseased | C  | 21-15,16 | 10217 | 99   | 178.7 | ERS2071255 | 54469 |
| SK163     | 2017 | Nigeria | Sokoto  | diseased | C  | 21-15,16 | 10217 | 92   | 132.1 | ERS2071296 | 56534 |
| SK193     | 2017 | Nigeria | Sokoto  | diseased | C  | 21-15,16 | 10217 | 94   | 150.1 | ERS2071302 | 56535 |
| SK225     | 2017 | Nigeria | Sokoto  | diseased | C  | 21-15,16 | 10217 | 92   | 151.0 | ERS2071306 | 56536 |
| SK246     | 2017 | Nigeria | Sokoto  | diseased | C  | 21-15,16 | 10217 | 93   | 121.6 | ERS2071308 | 56537 |
| MM_B_1631 | 2017 | Nigeria | Sokoto  | diseased | C  | 21-15,16 | 10217 | 84   | 96.7  | ERS2071238 | 56541 |
| MM_B_4593 | 2017 | Nigeria | Sokoto  | diseased | C  | 21-15,16 | 10217 | 94   | 98.0  | ERS2071239 | 56544 |
| MM_B_4691 | 2017 | Nigeria | Sokoto  | diseased | C  | 21-15,16 | 10217 | 94   | 86.2  | ERS2071240 | 56545 |
| MM_C_4691 | 2017 | Nigeria | Sokoto  | diseased | C  | 21-15,16 | 10217 | 90   | 112.3 | ERS2071241 | 56546 |
| SK069     | 2017 | Nigeria | Sokoto  | diseased | C  | 21-15,16 | 10217 | 96   | 94.4  | ERS2071287 | 56554 |
| SK075     | 2017 | Nigeria | Sokoto  | diseased | C  | 21-15,16 | 10217 | 91   | 116.9 | ERS2071288 | 56555 |
| SK96      | 2017 | Nigeria | Sokoto  | diseased | C  | 21-15,16 | 10217 | 104  | 135.8 | ERS2071321 | 56556 |
| SK99      | 2017 | Nigeria | Sokoto  | diseased | C  | 21-15,16 | 11561 | 95   | 92.6  | ERS2071322 | 56557 |
| SK101     | 2017 | Nigeria | Sokoto  | diseased | C  | 21-15,16 | 10217 | 103  | 78.5  | ERS2071290 | 56558 |
| SK153     | 2017 | Nigeria | Sokoto  | diseased | C  | 21-15,16 | 10217 | 92   | 101.1 | ERS2071295 | 56559 |
| SK186     | 2017 | Nigeria | Sokoto  | diseased | C  | 21-15,16 | 10217 | 92   | 87.1  | ERS2071298 | 56560 |
| SK187     | 2017 | Nigeria | Sokoto  | diseased | C  | 21-15,16 | 10217 | 95   | 106.1 | ERS2071299 | 56561 |
| SK192     | 2017 | Nigeria | Sokoto  | diseased | C  | 21-15,16 | 10217 | 91   | 86.9  | ERS2071301 | 56562 |
| SK203     | 2017 | Nigeria | Sokoto  | diseased | C  | 21-15,16 | 10217 | 98   | 102.9 | ERS2071304 | 56563 |
| SK233     | 2017 | Nigeria | Sokoto  | diseased | C  | 21-15,16 | 10217 | 106  | 127.7 | ERS2071307 | 56564 |
| SK250     | 2017 | Nigeria | Sokoto  | diseased | C  | 21-15,16 | 10217 | 99   | 98.4  | ERS2071309 | 56565 |
| SK292     | 2017 | Nigeria | Sokoto  | diseased | C  | 21-15,16 | 10217 | 102  | 93.5  | ERS2071310 | 56566 |
| SK304     | 2017 | Nigeria | Sokoto  | diseased | C  | 21-15,16 | 10217 | 1245 | 57.3  | ERS2071312 | 56567 |
| SK307     | 2017 | Nigeria | Sokoto  | diseased | C  | 21-15,16 | 10217 | 125  | 129.3 | ERS2071313 | 56568 |
| SK319     | 2017 | Nigeria | Sokoto  | diseased | C  | 21-15,16 | 10217 | 97   | 88.7  | ERS2071314 | 56569 |

|       |      |         |        |          |   |          |       |     |       |            |       |
|-------|------|---------|--------|----------|---|----------|-------|-----|-------|------------|-------|
| SK325 | 2017 | Nigeria | Sokoto | diseased | C | 21-15,16 | 10217 | 102 | 129.9 | ERS2071315 | 56570 |
| SK326 | 2017 | Nigeria | Sokoto | diseased | C | 21-15,16 | 10217 | 99  | 117.5 | ERS2071316 | 56571 |
| SK327 | 2017 | Nigeria | Sokoto | diseased | C | 21-15,16 | 10217 | 96  | 105.6 | ERS2071317 | 56572 |
| SK336 | 2017 | Nigeria | Sokoto | diseased | C | 21-15,16 | 10217 | 96  | 93.0  | ERS2071318 | 56573 |
| SK352 | 2017 | Nigeria | Sokoto | diseased | C | 21-15,16 | 10217 | 87  | 141.1 | ERS2071319 | 56574 |
| SK356 | 2017 | Nigeria | Sokoto | diseased | C | 21-15,16 | 10217 | 86  | 97.3  | ERS2071320 | 56575 |
| SK150 | 2017 | Nigeria | Sokoto | diseased | C | 21-15,16 | 10217 | 104 | 134.4 | ERS2071294 | 56577 |

**Supplementary Table ST1** – Isolates used in this study.

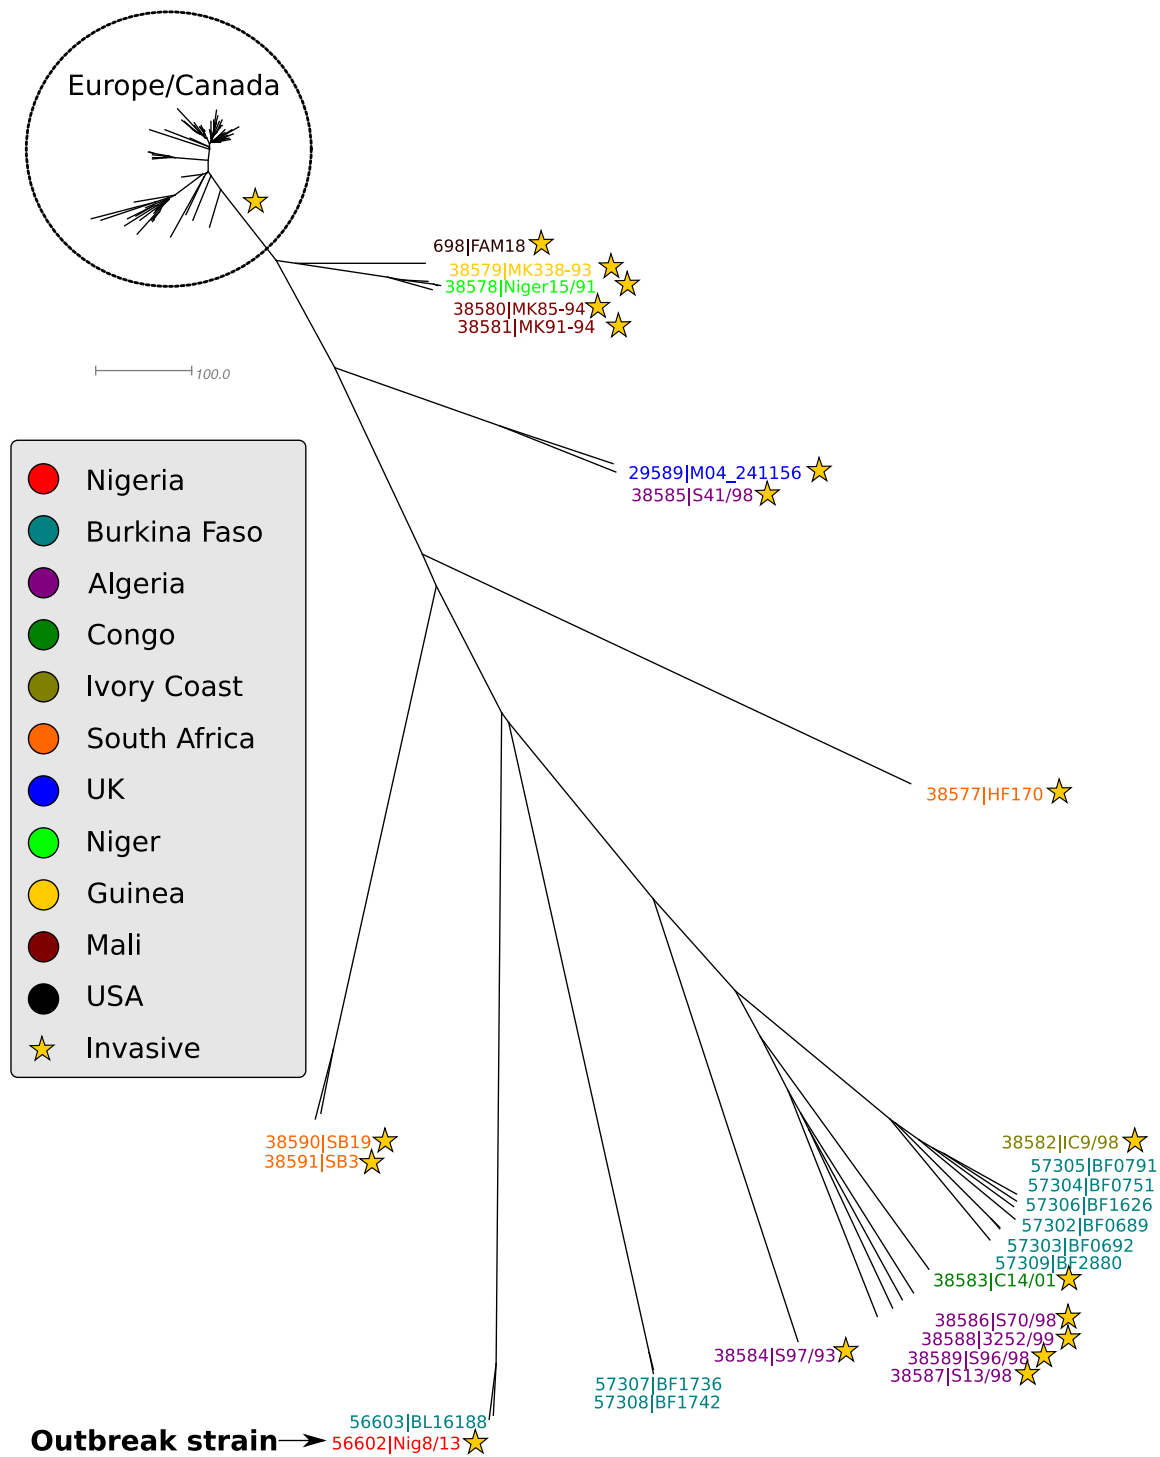

**Supplementary Figure SF1:** cgMLST-based tree of the outbreak and carrier strains, as well as other African NmC and isolates found to have relatively similar capsule through allele-based comparison. Colors are according to country of isolation, and a star is used to indicate invasiveness. (For the Europe/Canada cluster, every strain is invasive and individual country information has not been added.) Nig8/13 represents

the entire outbreak (ST-10217) in this figure. BL16188 and the outbreak strain are very closely related compared to all other hitherto publicly available sequences.

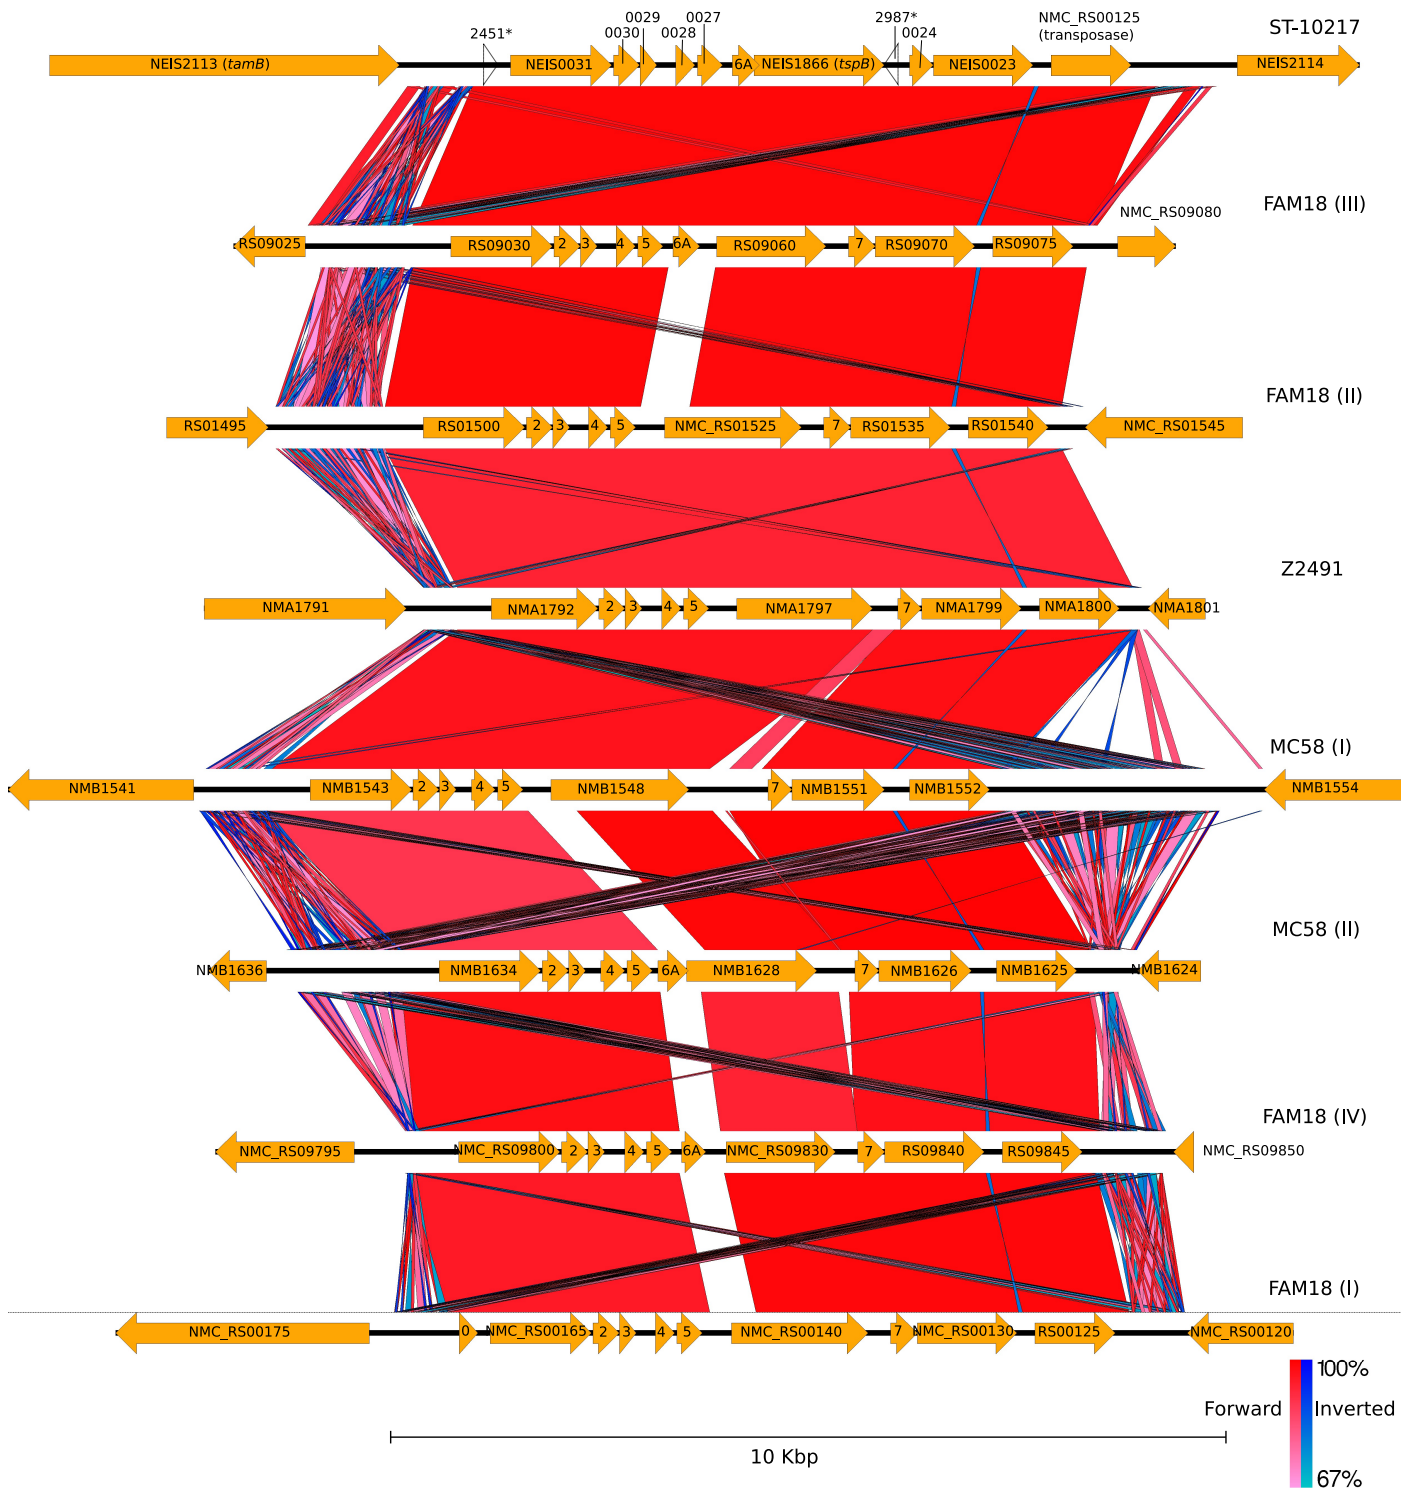

**Supplementary Figure SF2:** Comparison of the MDAΦ prophage in Nig8/13 (representing ST-10217) to those found in Z2491, MC58 and FAM18, using the Bille *et al.* (2005) terminology. For Nig8/13, the annotations have been made using NEIS numbers from pubmlst. Genes that were called by pubmlst but not by an independent gene caller (Prokka) have been left transparent. (NEIS2451 corresponds to ORF10 of MDAΦ and is likely a transcribed gene. NEIS2987 has not been previously described and is in the opposite

direction and might be an incidental finding. NMC\_RS00125 does not have a corresponding NEIS number and was only called by Prokka. However, this gene clearly corresponds to the previously described ORF9.) For Z2491, MC58 and FAM18, short ORFs have only been annotated with a single number, corresponding to the ORF number in MDAΦ's nomenclature. Red color corresponds to sequence homology in the forward direction, and blue to sequence homology in the reverse direction.



| Isolate | Type | Upstream | ORF10      | ORF1     | ORF2     | ORF3     | ORF4     | ORF5     | ORF6A        | ORF6     | ORF7     | ORF8     | ORF9         | Downstream |
|---------|------|----------|------------|----------|----------|----------|----------|----------|--------------|----------|----------|----------|--------------|------------|
| Nig8/13 | I    | NEIS2113 | NEIS2451** | NEIS0031 | NEIS0030 | NEIS0029 | NEIS0028 | NEIS0027 | NMC_RS09055* | NEIS1866 | NEIS0024 | NEIS0023 | NMC_RS00125* | NEIS2114   |
| Z2491   | I    | NMA1791  |            | NMA1792  | NMA1793  | NMA1794  | NMA1795  | NMA1796  |              | NMA1797  | NMA1798  | NMA1799  | NMA1800      | NMA1801    |
| MC58    | I    | NMB1541  |            | NMB1543  | NMB1544  | NMB1545  | NMB1546  | NMB1547  |              | NMB1548  | NMB1550  | NMB1551  | NMB1552      | NMB1554    |
| MC58    | II   | NMB1636  |            | NMB1634  | NMB1633  | NMB1632  | NMB1631  | NMB1630  | NMB1629      | NMB1628  | NMB1627  | NMB1626  | NMB1625      | NMB1624    |
| FAM18   | I    | RS00175  | RS00170    | RS00165  | RS00160  | RS00155  | RS00150  | RS00145  |              | RS00140  | RS00135  | RS00130  | RS00125      | RS00120    |
| FAM18   | II   | RS01495  |            | RS01500  | RS01505  | RS01510  | RS01515  | RS01520  |              | RS01525  | RS01530  | RS01535  | RS01540      | RS01545    |
| FAM18   | III  | RS09025  |            | RS09030  | RS09035  | RS09040  | RS09045  | RS09050  | RS09055      | RS09060  | RS09065  | RS09070  | RS09075      | RS09080    |
| FAM18   | IV   | RS09795  |            | RS09800  | RS09805  | RS09810  | RS09815  | RS09820  | RS09825      | RS09830  | RS09835  | RS09840  | RS09845      | RS09850    |

\*=Predicted, not called by  
pubmlst

\*\*=Not predicted but called by pubmlst

**Supplementary Table ST2** – Comparison of open reading frames in the MDAΦ phage with those in the corresponding regions of Z2491, MC58 and FAM18. The type is annotated as in Bille *et al.*, 2005. For FAM18, the prefix “NMC\_” has been removed from all annotations.

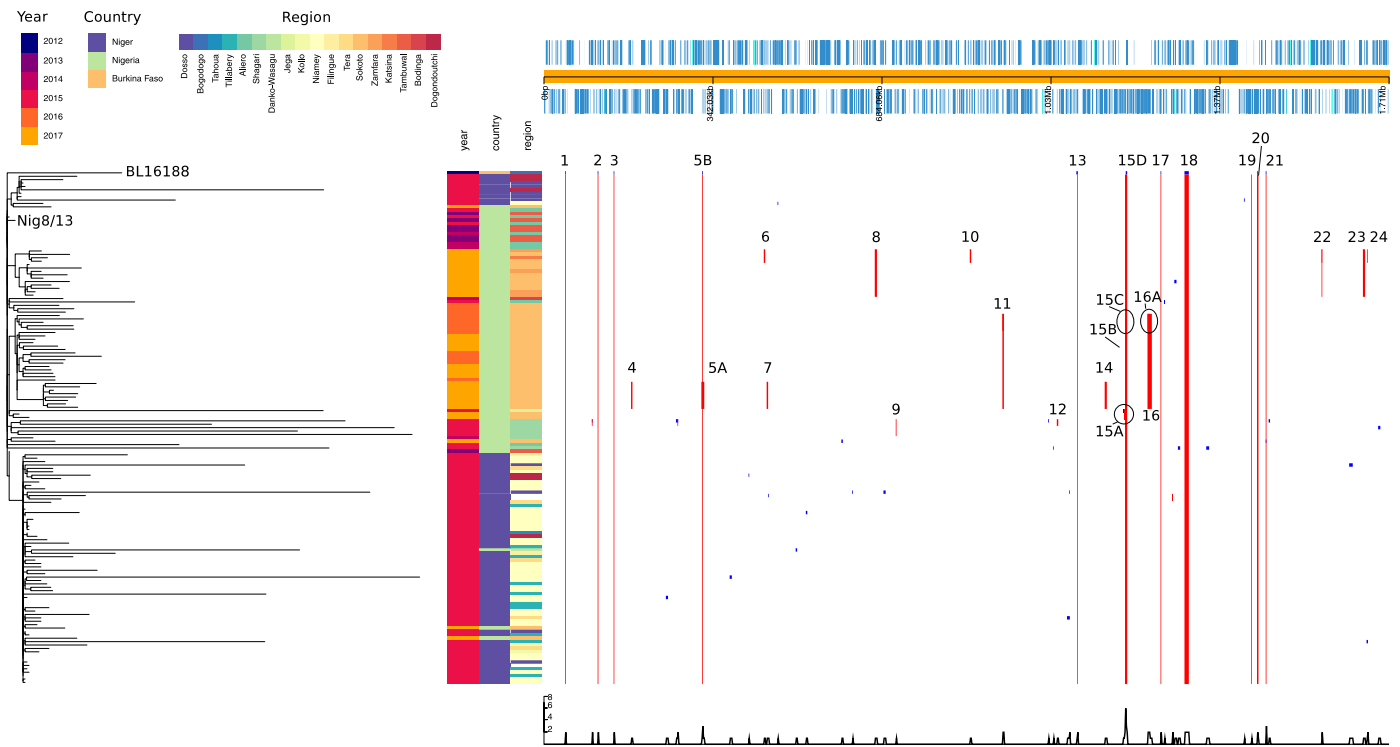

**Supplementary Figure SF3:** Phandango plot showing recombination events within ST-10217 and between BL16188 and ST-10217. The numbering of recombination events corresponds to Supplementary Table ST3, where all affected genes are described. The tall red blocks (1, 2, 3, 5B, 13, 15D, 17, 18, 19, 20, 21) are recombination events that have happened on the branch between the carrier (BL16188) and the outbreak. The horizontal axis corresponds to an alignment of the core *N. meningitidis* genome. The tree used in this figure is the recombination-filtered tree from Gubbins.

| Block | All ST-10217 | Coord start | Coord stop | NEIS no. | Pubmlst annotation                                       |
|-------|--------------|-------------|------------|----------|----------------------------------------------------------|
| 1     | X            | 43 948      | 44 504     | NEIS0372 | hypothetical protein                                     |
| 2     | X            | 109 960     | 110 518    | NEIS0433 | ATP-dependent DNA helicase <i>RecG</i>                   |
| 3     | X            | 141 525     | 143 376    | NEIS0484 | hypothetical protein                                     |
|       |              |             |            | NEIS0486 | alcohol dehydrogenase ( <i>adhA</i> )                    |
| 4     |              | 176 337     | 179 224    | NEIS0521 | ABC transporter ATP-binding protein                      |
|       |              |             |            | NEIS0523 | electron transfer flavoprotein-ubiquinone oxidoreductase |
|       |              |             |            | NEIS0694 | putative DNA repair protein                              |
|       |              |             |            | NEIS0695 | hypothetical protein                                     |
| 5A    |              | 319 497     | 324 686    | NEIS0696 | hypothetical protein                                     |
|       |              |             |            | NEIS0697 | ubiquinone/menaquinone biosynthesis methyltransferase    |
|       |              |             |            | NEIS0698 | hypothetical protein                                     |
| 5B    | X            | 320 135     | 321 968    | NEIS0694 | putative DNA repair protein                              |
|       |              |             |            | NEIS0695 | hypothetical protein                                     |
| 6     |              | 444 926     | 448 680    | NEIS0897 | <i>icd</i> - isocitrate dehydrogenase (NADP+)            |
|       |              |             |            | NEIS0899 | <i>Ist</i> (alpha-2,3-sialyltransferase)                 |
|       |              |             |            | NEIS0900 | putative C-type cytochrome                               |
|       |              |             |            | NEIS0901 | putative oxidoreductase                                  |
|       |              |             |            | NEIS0907 | dihydrodipicolinate synthase                             |
| 7     |              | 451 181     | 453 942    | NEIS0908 | transmembrane transport protein                          |
|       |              |             |            | NEIS0909 | RNA methylase                                            |
|       |              |             |            | NEIS1166 | hypothetical protein                                     |
| 8     |              | 670 548     | 673 840    | NEIS1168 | ferredoxin--NADP reductase                               |
|       |              |             |            | NEIS1170 | putative P-type cation-transporting ATPase               |
| 9     |              | 712548      | 714621     | NEIS1210 | site-specific recombinase                                |
|       |              |             |            | NEIS1212 | murein hydrolase                                         |
|       |              |             |            | NEIS1365 | transcription elongation factor <i>GreA</i>              |
| 10    |              | 862 315     | 865 354    | NEIS1366 | 3-phosphoshikimate 1-carboxyvinyltransferase             |
|       |              |             |            | NEIS1367 | putative lipoprotein                                     |
|       |              |             |            | NEIS1368 | phospholipase D-family protein                           |
|       |              |             |            | NEIS1429 | aspartate kinase                                         |
| 11    |              | 928 127     | 932 002    | NEIS1430 | ribonuclease PH                                          |
|       |              |             |            | NEIS1431 | hypothetical protein                                     |
|       |              |             |            | NEIS1432 | hypothetical protein                                     |
|       |              |             |            | NEIS1433 | hypothetical protein                                     |
|       |              |             |            | NEIS1435 | nicotinate phosphoribosyltransferase                     |
| 12    |              | 1 038 062   | 1 041 948  | NEIS2458 | Tellurite resistance protein <i>TehB</i>                 |
|       |              |             |            | NEIS1544 | ribonuclease H                                           |
|       |              |             |            | NEIS1545 | hypothetical protein                                     |

|            |   |           |           |             |                                                                     |
|------------|---|-----------|-----------|-------------|---------------------------------------------------------------------|
|            |   |           |           | NEIS1546    | hypothetical protein                                                |
|            |   |           |           | <i>hmbR</i> | haemoglobin receptor protein                                        |
| <b>13</b>  | X | 1 078 946 | 1 081 671 | NEIS1587    | haem utilisation protein ( <i>hemO</i> )                            |
|            |   |           |           | NEIS1588    | putative paraquat-inducible protein A                               |
|            |   |           |           | NEIS1638    | exodeoxyribonuclease V                                              |
| <b>14</b>  |   | 1 135 732 | 1 139 568 | NEIS1639    | putative integral membrane protein                                  |
|            |   |           |           | NEIS1640    | cytochrome c oxidase subunit III                                    |
| <b>15A</b> |   | 1 175 591 | 1 178 486 | NEIS1691    | transferrin-binding protein 1 ( <i>tbpB</i> )                       |
|            |   |           |           | NEIS1692    | glutamate racemase                                                  |
| <b>15B</b> |   | 1 177 124 | 1 178 099 | NEIS1691    | transferrin-binding protein 1 ( <i>tbpB</i> )                       |
|            |   |           |           | NEIS1692    | glutamate racemase                                                  |
|            |   |           |           | NEIS1691    | transferrin-binding protein 1 ( <i>tbpB</i> )                       |
| <b>15C</b> |   | 1 177 124 | 1 179 806 | NEIS1692    | glutamate racemase                                                  |
|            |   |           |           | NEIS1693    | hypothetical protein                                                |
|            |   |           |           | NEIS1694    | N-acetylmuramoyl-L-alanine amidase ( <i>amiC</i> )                  |
|            |   |           |           | NEIS1691    | transferrin-binding protein 1 ( <i>tbpB</i> )                       |
|            |   |           |           | NEIS1692    | glutamate racemase                                                  |
| <b>15D</b> | X | 1 177 150 | 1 181 038 | NEIS1693    | hypothetical protein                                                |
|            |   |           |           | NEIS1694    | N-acetylmuramoyl-L-alanine amidase ( <i>amiC</i> )                  |
|            |   |           |           | NEIS1695    | hypothetical protein                                                |
|            |   |           |           | NEIS1750    | hypothetical protein                                                |
| <b>16A</b> |   | 1 222 382 | 1 226 133 | NEIS1751    | UDP-N-acetylmuramoylalanyl-D-glutamate--2, 6-diaminopimelate ligase |
|            |   |           |           | NEIS1753    | penicillin-binding protein 2 ( <i>penA</i> )                        |
|            |   |           |           | NEIS1750    | hypothetical protein                                                |
|            |   |           |           | NEIS1751    | UDP-N-acetylmuramoylalanyl-D-glutamate--2, 6-diaminopimelate ligase |
|            |   |           |           | NEIS1753    | penicillin-binding protein 2 ( <i>penA</i> )                        |
| <b>16B</b> |   | 1 222 382 | 1 230 880 | NEIS1754    | putative small periplasmic protein                                  |
|            |   |           |           | NEIS1755    | S-adenosyl-methyltransferase <i>MraW</i>                            |
|            |   |           |           | NEIS1756    | cell division protein <i>MraZ</i>                                   |
|            |   |           |           | NEIS1757    | hypothetical protein                                                |
|            |   |           |           | NEIS1759    | undecaprenyl pyrophosphate phosphatase                              |
| <b>17</b>  | X | 1 247 776 | 1 250 014 | NEIS1777    | maltose phosphorylase ( <i>mapA</i> )                               |
|            |   |           |           | NEIS1779    | integral membrane transport protein                                 |
|            |   |           |           | NEIS0275    | putative outer membrane solvent tolerance protein                   |
|            |   |           |           | NEIS0274    | hypothetical protein                                                |
|            |   |           |           | NEIS0273    | thiol:disulphide interchange protein encodes DsbA1; oxidoreductase  |
| <b>18</b>  | X | 1 297 533 | 1 305 508 | NEIS0272    | putative inner membrane protein                                     |
|            |   |           |           | NEIS0271    | hypothetical protein                                                |
|            |   |           |           | NEIS0270    | indole-3-glycerol-phosphate synthase                                |
|            |   |           |           | NEIS0269    | ATP-dependent DNA helicase                                          |

|    |   |           |           |          |                                                            |
|----|---|-----------|-----------|----------|------------------------------------------------------------|
|    |   |           |           | NEIS0119 | 50S ribosomal protein L11 ( <i>rplK</i> )                  |
| 19 | X | 1 432 459 | 1 433 843 | NEIS0118 | transcription antitermination protein ( <i>nusG</i> )      |
|    |   |           |           | NEIS0117 | <i>secE</i>                                                |
|    |   |           |           | NEIS0116 | <i>tuf</i>                                                 |
| 20 | X | 1 443 217 | 1 446 560 | NEIS0106 | putative two-component sensor kinase                       |
|    |   |           |           | NEIS0105 | hypothetical protein                                       |
|    |   |           |           | NEIS0104 | SUN-family protein                                         |
|    |   |           |           | NEIS0103 | methionyl-tRNA formyltransferase                           |
| 21 | X | 1 461 464 | 1 463 242 | NEIS0073 | outer membrane transport protein                           |
|    |   |           |           | NEIS2514 | hypothetical protein                                       |
|    |   |           |           | NEIS0072 | hypothetical protein                                       |
| 22 |   | 1 574 985 | 1 576 160 | NEIS0071 | putative lipoprotein                                       |
|    |   |           |           | NEIS2044 | hypothetical protein                                       |
| 23 |   | 1 657 466 | 1 662 375 | NEIS2043 | <i>ThiF</i> protein                                        |
|    |   |           |           | NEIS1957 | DNA polymerase I                                           |
|    |   |           |           | NEIS1956 | S-ribosylhomocysteinase                                    |
|    |   |           |           | NEIS1955 | hypothetical protein                                       |
|    |   |           |           | NEIS1954 | frataxin-like protein                                      |
|    |   |           |           | NEIS1953 | putative lipoprotein                                       |
|    |   |           |           | NEIS1952 | diaminopimelate decarboxylase                              |
|    |   |           |           | NEIS2995 | membrane protein                                           |
| 24 |   | 1 667 098 | 1 668 614 | NEIS1951 | putative sodium-dependent inner membrane transport protein |
|    |   |           |           | NEIS1945 | hypothetical protein                                       |
|    |   |           |           | NEIS1944 | putative para-aminobenzoate synthase component I           |

**Supplementary Table ST3** – Recombination blocks identified on the branch between BL16188 and ST-10217 (With “X” in “All ST-10217”) and on internal branches of the ST-10217 phylogeny, with associated loci/products. Block = Recombination block number, corresponding to Supplementary Figure SF3. Coord start/stop = Determined breakpoints of the recombination block in an alignment of all *N. meningitidis* cgMLST v1.0 loci, total length 1 705 235 bp. NEIS no. = Accession number of locus in pubmlst, if available. Pubmlst annotation = Annotation of the locus in pubmlst.

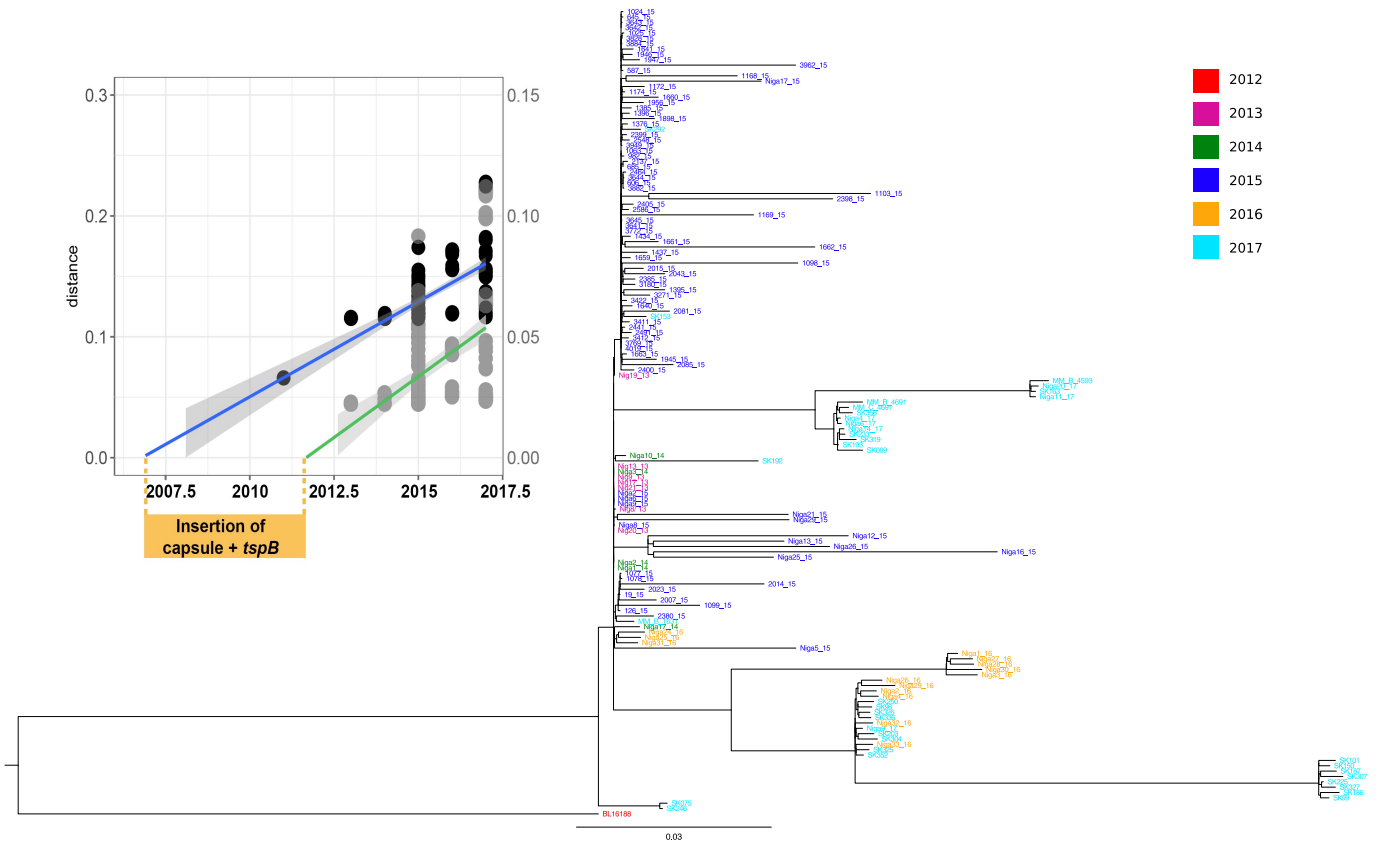

**Supplementary Figure SF4:** Maximum-likelihood tree based on SNPs from a whole-genome alignment of all outbreak isolates, with carrier strain BL16188 set as the outgroup. Colors are according to sample year. This tree is used to infer a root-to-tip time signal, for use in a regression analysis to determine the most probable time of horizontal acquisition of the capsule and the MDA prophage (Left).

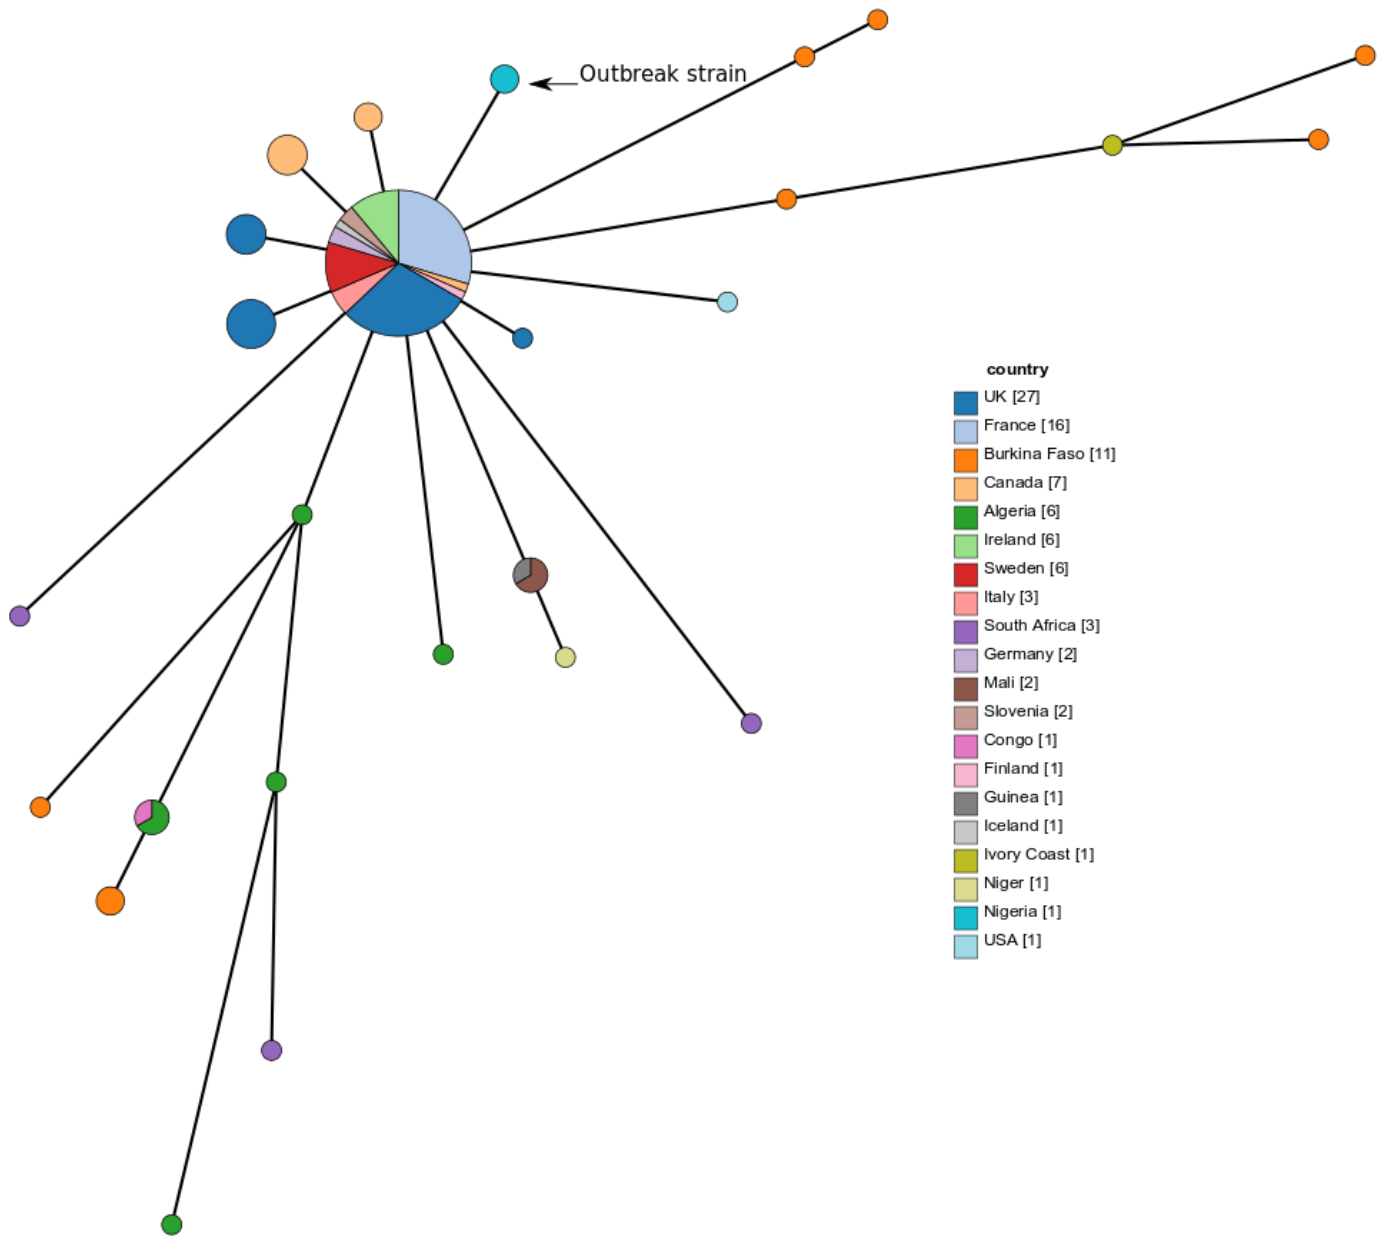

**Supplementary Figure SF5:** Allele-based minimum spanning tree of capsule locus only (NEIS0049-NEIS0059), intended to show potential donors of ST-10217s capsule. Colors are according to country of origin. European/Canadian group C capsules appear to be more closely related to ST-10217's capsule than other African NmC.

| Isolate name | Year    | Country      | Host status | Serogroup | PorA type | ST    | BIGS id. |
|--------------|---------|--------------|-------------|-----------|-----------|-------|----------|
| BF0689       | 2009    | Burkina Faso | carrier     | C         | 5-2,10-2  | 206   | 57302    |
| BF0692       | 2009    | Burkina Faso | carrier     | C         | 5-2,10-2  | 206   | 57303    |
| BF0751       | 2009    | Burkina Faso | carrier     | C         | 7,30-8    | 206   | 57304    |
| BF0791       | 2009    | Burkina Faso | carrier     | C         | 7,30-11   | 7929  | 57305    |
| BF1626       | 2010    | Burkina Faso | carrier     | C         | 7-43,30   | 206   | 57306    |
| BF1736       | 2010    | Burkina Faso | carrier     | C         | 5-1,2-2   | 865   | 57307    |
| BF1742       | 2010    | Burkina Faso | carrier     | C         | 5-1,2-2   | 865   | 57308    |
| BF2880       | 2012    | Burkina Faso | carrier     | C         | 7-2,30-11 | 206   | 57309    |
| FAM18        | 1983    | USA          | diseased    | C         | 5,2       | 11    | 698      |
| HF170        | 1973    | South Africa | diseased    | C         | 5-1,10-4  | 8245  | 38577    |
| Niger15/91   | 1991    | Niger        | diseased    | C         | 5,2-1     | 11    | 38578    |
| MK338/93     | 1993    | Guinea       | diseased    | C         | 5,2-1     | 11    | 38579    |
| MK85/94      | 1994    | Mali         | diseased    | C         | 5,2-1     | 165   | 38580    |
| MK91/94      | 1994    | Mali         | diseased    | C         | 5,2-1     | 165   | 38581    |
| IC9/98       | 1998    | Ivory Coast  | diseased    | C         | 7,30-8    | 206   | 38582    |
| C14/01       | 2001    | Congo        | diseased    | C         | 5-2,10-64 | 206   | 38583    |
| S97/93       | 1993    | Algeria      | diseased    | C         | 18-1,34   | 409   | 38584    |
| S41/98       | 1998    | Algeria      | diseased    | C         | 18-1,3    | 11    | 38585    |
| S70/98       | 1998    | Algeria      | diseased    | C         | 18-23,1   | 206   | 38586    |
| S13/98       | 1998    | Algeria      | diseased    | C         | 18-3,1    | 11588 | 38587    |
| 3252/99      | 1999    | Algeria      | diseased    | C         | 18-3,1    | 337   | 38588    |
| S96/98       | 1998    | Algeria      | diseased    | C         | 18-3,1    | 4711  | 38589    |
| SB19         | 1990    | South Africa | diseased    | C         | 5-2       | 8     | 38590    |
| SB3          | 1990    | South Africa | diseased    | C         | 5-2       | 8     | 38591    |
| M12 240255   | 2012    | UK           | diseased    | C         | 5-2       | 11    | 21458    |
| M12 240716   | 2012    | UK           | diseased    | C         | 5-2       | 11    | 28084    |
| M04 241156   | 2004    | UK           | diseased    | C         | 5-2       | 11    | 29589    |
| M07 240686   | 2007    | UK           | diseased    | C         | 5-2       | 7779  | 29626    |
| M98 253000   | 1998    | UK           | other       | C         | 5-2       | 11    | 29646    |
| M10 240229   | 2010    | UK           | diseased    | C         | 5-2       | 11    | 29891    |
| M13 240496   | 2013    | UK           | diseased    | C         | 5-2       | 11    | 29895    |
| M13 240514   | 2013    | UK           | diseased    | C         | 5-2       | 11    | 29898    |
| M14 240100   | 2014    | UK           | diseased    | C         | 5-2       | 11    | 30214    |
| M14 240107   | 2014    | UK           | diseased    | C         | 5-2       | 11    | 30215    |
| M14 240184   | Unknown | Canada       | diseased    | C         | 5-2       | 11    | 30287    |
| 12009-14     | 2014    | Ireland      | diseased    | B         | 5-2       | 11    | 30694    |
| 12038-13     | 2013    | Ireland      | diseased    | C         | 5-2       | 11    | 30727    |
| M14 240168   | 2014    | UK           | diseased    | C         | 5-2       | 11    | 35628    |
| M14 240405   | 2014    | UK           | diseased    | C         | 5-2       | 11    | 35762    |
| M14 240436   | 2014    | UK           | diseased    | C         | 5-2       | 11    | 35775    |
| 12034_2014   | 2014    | Ireland      | diseased    | C         | 5-2       | 11    | 36156    |
| 12035_2014   | 2014    | Ireland      | diseased    | C         | 5-2       | 11    | 36157    |
| 12008_2015   | 2015    | Ireland      | diseased    | C         | 5-2       | 11    | 36817    |
| 12020-2015   | 2015    | Ireland      | diseased    | C         | 5-2       | 11    | 36828    |
| 85Mo         | 2012    | Slovenia     | diseased    | C         | 5-2       | 11    | 38152    |
| 2533         | 2012    | Italy        | diseased    |           | 5-2       | 11    | 38865    |
| LNP28303     | 2015    | France       | diseased    | C         | 5-2       | 11    | 40239    |



|            |      |          |          |   |     |    |       |
|------------|------|----------|----------|---|-----|----|-------|
| LNP28344   | 2015 | France   | diseased | C | 5-2 | 11 | 40274 |
| LNP28383   | 2016 | France   | diseased | C | 5-2 | 11 | 40408 |
| LNP28270   | 2015 | France   | diseased | C | 5-2 |    | 40472 |
| LNP28276   | 2015 | France   | diseased | C | 5-2 | 11 | 40475 |
| LNP28289   | 2015 | France   | diseased | C | 5-2 | 11 | 40482 |
| M15 240872 | 2015 | UK       | diseased | C | 5-2 | 11 | 41468 |
| LNP28411   | 2016 | France   | diseased | C | 5-2 | 11 | 41578 |
| LNP28422   | 2016 | France   | diseased | C | 5-2 | 11 | 41587 |
| 149M       | 2015 | Slovenia | diseased | C | 5-2 | 11 | 41717 |
| LNP28426   | 2016 | France   | diseased | C | 5-2 | 11 | 41793 |
| LNP28448   | 2016 | France   | diseased | C | 5-2 | 11 | 41801 |
| LNP28451   | 2016 | France   | diseased | C | 5-2 | 11 | 41804 |
| LNP28456   | 2016 | France   | diseased | C | 5-2 | 11 | 41809 |
| LNP28470   | 2016 | France   | diseased | C | 5-2 | 11 | 41821 |
| 16-88      | 2016 | Sweden   | diseased | C | 5-2 | 11 | 41965 |
| LNP28481   | 2016 | France   | diseased | C | 5-2 | 11 | 42047 |
| 1459000190 | 2014 | Sweden   | diseased | C | 5-2 | 11 | 42366 |
| 1459000254 | 2014 | Sweden   | diseased | C | 5-2 | 11 | 42374 |
| 15-29      | 2015 | Sweden   | diseased | C | 5-2 | 11 | 42414 |
| 15-81      | 2015 | Sweden   | diseased | C | 5-2 | 11 | 42437 |
| M16 240142 | 2016 | UK       | diseased | C | 5-2 | 11 | 42577 |
| LNP28568   | 2016 | France   | diseased | C | 5-2 | 11 | 42879 |
| LNP28570   | 2016 | France   | diseased | C | 5-2 | 11 | 42881 |
| 16-8702245 | 2016 | UK       | diseased | C | 5-2 | 11 | 44693 |
| M16 240383 | 2016 | UK       | diseased | C | 5-2 | 11 | 44770 |
| 704070003  | 2007 | Iceland  | diseased | C | 5-2 |    | 44880 |
| DE8555     | 2002 | Germany  |          |   | 5-2 | 11 | 46977 |
| WUE2121    | 1997 | Germany  |          |   | 5-2 | 11 | 47012 |
| M16 240564 | 2016 | UK       | diseased | C | 5-2 | 11 | 47298 |
| Nmiss2821  | 2016 | Italy    |          | C | 5-2 | 11 | 49274 |
| 16-482     | 2016 | Sweden   | diseased | C | 5-2 | 11 | 50862 |
| 14.8703928 | 2014 | UK       | diseased | C | 5-2 | 11 | 51613 |
| 14.8705635 | 2014 | UK       |          | C | 5-2 | 11 | 52835 |
| 16.8710714 | 2016 | UK       |          | C | 5-2 | 11 | 52888 |
| 2636       | 2016 | Italy    |          | C | 5-2 | 11 | 52959 |
| M16 240752 | 2016 | UK       | diseased | C | 5-2 | 11 | 53088 |
| M16 240760 | 2016 | UK       | diseased | C | 5-2 | 11 | 53095 |
| M16 240775 | 2016 | UK       | diseased | C | 5-2 | 11 | 53105 |
| M17 240066 | 2017 | UK       | diseased | C | 5-2 | 11 | 53262 |
| M17 240136 | 2017 | UK       | diseased | C | 5-2 | 11 | 53303 |
| M17 240153 | 2017 | UK       | diseased | C | 5-2 | 11 | 53317 |
| 114728     | 2017 | Finland  |          | C | 5-2 | 11 | 53426 |
| NMLC249    | 2006 | Canada   |          | C | 5-2 | 11 | 53786 |
| NMLC113    | 2009 | Canada   |          | C | 5-2 | 11 | 53788 |
| NMLC203    | 2009 | Canada   |          | C | 5-2 | 11 | 53789 |
| NMLC066    | 2013 | Canada   |          | C | 5-2 | 11 | 53796 |
| NMLC102    | 2014 | Canada   |          | C | 5-2 | 11 | 53797 |
| NMLC107    | 2014 | Canada   |          | C | 5-2 | 11 | 53798 |
| 12010-16   | 2016 | Ireland  |          | C | 5-2 | 11 | 55530 |

|          |      |         |  |   |     |    |       |
|----------|------|---------|--|---|-----|----|-------|
| 12020-16 | 2016 | Ireland |  | C | 5-2 | 11 | 55537 |
| 12027-16 | 2016 | Ireland |  | C | 5-2 | 11 | 55542 |
| 12030-16 | 2016 | Ireland |  | C | 5-2 | 11 | 55543 |
| 12046-16 | 2016 | Ireland |  | C | 5-2 | 11 | 55554 |
| 12048-16 | 2016 | Ireland |  | B | 5-2 | 11 | 55555 |
| 12001-17 | 2017 | Ireland |  | C | 5-2 | 11 | 55566 |
| 12002-17 | 2017 | Ireland |  | C | 5-2 | 11 | 55567 |
| 12016-17 | 2017 | Ireland |  | C | 5-2 | 11 | 55577 |
| 12017-17 | 2017 | Ireland |  | C | 5-2 | 11 | 55578 |
| 12026-17 | 2017 | Ireland |  | C | 5-2 | 11 | 55585 |

**Supplementary Table ST4** – Other related isolates (mostly serogroup C) available from pubmlst and used for comparison in Supplementary Figure 1.
